# Supplementary material for: Evaluation of Formalin-Inactivated Vaccine Efficacy against Red Seabream Iridovirus (RSIV) in Laboratory and Field Conditions
Source: MDPI journal article supplement (doi:10.3390/vaccines12060680), 2024-06-19
Supplement: s1 [file s1]

**Supplemental Table S1.** Efficacy of formalin-inactivated RSIV vaccine in rock bream under laboratory and field conditions. The table shows the results of vaccine efficacy in two different commercial farms comparing vaccinated and control groups across different sampling points (weeks post-vaccination).

| Experimental condition |                                                                  | Sampling point<br>(weeks<br>post-vaccination) | Group      | Average<br>body weight<br>(g) | No. of<br>tested fish | No. of<br>survival fish | Cumulative<br>mortality<br>(%) | Relative percentage<br>of survival<br>(RPS, %) |
|------------------------|------------------------------------------------------------------|-----------------------------------------------|------------|-------------------------------|-----------------------|-------------------------|--------------------------------|------------------------------------------------|
| Farm A                 | Artificially infected <sup>a</sup><br>(In laboratory conditions) | 3                                             | Vaccinated | 21.4 ± 4.0                    | 15                    | 9                       | 40.0                           | 60.0                                           |
|                        |                                                                  | 3                                             | Control    | 17.1 ± 1.7                    | 15                    | 0                       | 100.0                          | -                                              |
|                        |                                                                  | 6                                             | Vaccinated | 53.4 ± 15.9                   | 11                    | 7                       | 36.4                           | 63.6                                           |
|                        |                                                                  | 6                                             | Control    | 53.8 ± 12.3                   | 12                    | 0                       | 100.0                          | -                                              |
|                        |                                                                  | 9                                             | Vaccinated | 88.8 ± 16.9                   | 12                    | 8                       | 33.3                           | 66.7                                           |
|                        |                                                                  | 9                                             | Control    | 67.6 ± 9.8                    | 15                    | 0                       | 100.0                          | -                                              |
|                        |                                                                  | 12                                            | Vaccinated | 130.3 ± 19.5                  | 19                    | 15                      | 21.1                           | 78.9                                           |
|                        |                                                                  | 12                                            | Control    | 121.9 ± 10.0                  | 20                    | 0                       | 100.0                          | -                                              |
|                        |                                                                  | 15                                            | Vaccinated | 130.3 ± 19.5                  | 10                    | 8                       | 20.0                           | 80.0                                           |
|                        |                                                                  | 15                                            | Control    | 121.9 ± 10.0                  | 13                    | 0                       | 100.0                          | -                                              |
|                        | Non-infected<br>(In field conditions)                            | 18 <sup>c</sup>                               | Vaccinated | 152.7 ± 24.5                  | 16                    | 12                      | 25.0                           | 75.0                                           |
|                        |                                                                  | 18 <sup>c</sup>                               | Control    | 147.6 ± 18.2                  | 18                    | 0                       | 100.0                          | -                                              |
|                        |                                                                  | 18 <sup>c</sup>                               | Vaccinated | 152.7 ± 24.5                  | 31,100 <sup>d</sup>   | 30,450 <sup>e</sup>     | 2.09                           | -                                              |
|                        |                                                                  | 18 <sup>c</sup>                               | Control    | 147.6 ± 18.2                  | 10,400 <sup>d</sup>   | 10,080 <sup>e</sup>     | 3.08                           | -                                              |
| Farm B                 | Artificially infected <sup>a</sup><br>(In laboratory conditions) | 3                                             | Vaccinated | 50.9 ± 7.3                    | 15                    | 10                      | 33.3                           | 66.7                                           |
|                        |                                                                  | 3                                             | Control    | 55.7 ± 5.1                    | 15                    | 0                       | 100.0                          | -                                              |
|                        | Naturally infected <sup>b</sup><br>(In field conditions)         | 12 <sup>c</sup>                               | Vaccinated | 88.5 ± 14.5                   | 30,700 <sup>d</sup>   | 19,520 <sup>e</sup>     | 36.43                          | 54.67                                          |
|                        |                                                                  | 12 <sup>c</sup>                               | Control    | 79.5 ± 9.0                    | 31,000 <sup>d</sup>   | 6,100 <sup>e</sup>      | 80.32                          | -                                              |

<sup>a</sup> Rock bream artificially infected with intraperitoneal injection of IVS-1 (10<sup>4</sup> copies/mL) at 25°C under laboratory conditions.

<sup>b</sup> Rock bream naturally infected with RSIV under field conditions.

<sup>c</sup> At the ends of the field trial, fish were either transported to the laboratory for vaccine efficacy analysis or evaluated on-site.

<sup>d</sup> Initial number of fishes stocked in the marine cage.

<sup>e</sup> Number of fishes surviving in the marine cage at the end of the field trial.
